# Supplementary material
Source: publisher site journal article supplement (https://www.dovepress.com/article/207959)
Supplement: Supplementary file 1 [file get_supplementary_file.php]

Table S1 Relationship between patient characteristics and MTX-related leucopenia before every HD-MTX regimen

| Baseline characteristics | Leucopenia (grade **≥** 3) | | |
| --- | --- | --- | --- |
| 0 | 1 | P-value |
| **Gender** |  |  |  |
| Male | 160 | 57 | 0.358 |
| Female | 133 | 38 |  |
| **Subtype of tumor** |  |  |  |
| B | 265 | 80 | 0.093 |
| T | 28 | 15 |  |
| **BSA** | 0.73 (0.41,1.58) | 0.77 (0.42,1.77) | 0.430 |
| **Age** | 4.50 (0.83,14.00) | 4.58 (0.75,14.00) | 0.552 |
| **Degree of risk** |  |  |  |
| Low risk | 171 | 38 | 0.002 |
| Intermediate and high risk | 122 | 57 |  |
| **WBC (×109/L)** | 3.10 (1.09,20.64) | 2.49 (1.37,9.67) | 0.000 |
| **Hb (g/L)** | 103.09 ± 13.80 | 101.51 ± 14.24 | 0.299 |
| **PLT (×109/L)** | 262.00 (70.00,871.00) | 199.00 (67.00,581.00) | 0.000 |
| **ALB (g/L)** | 39.96 (26.00,49.80) | 40.38 (32.10,49.50) | 0.147 |
| **TBil (μmol/L)** | 7.07 (2.10,33.50) | 7.60 (2.70,28.10) | 0.044 |
| **ALT (U/L)** | 20.00 (3.90,199.60) | 26.00 (5.20,198.30) | 0.027 |
| **Cr** **(μmol/L)** | 42.50 (10.00,73.70) | 43.90 (10.00,73.90) | 0.133 |

Notes: Descriptive data are presented as the median (min, max).

Abbreviations: WBC, white blood cell count; Hb, hemoglobin; PLT, platelet count; ALB,albumin; TBil, total bilirubin; ALT, alanine transferase; Cr, creatinine.

Table S2 Relationship between patient characteristics and MTX-related anemia before every HD-MTX regimen

| Baseline characteristics | **Anemia** (grade ≥ 3) | | |
| --- | --- | --- | --- |
| 0 | 1 | P-value |
| **Gender** |  |  |  |
| Male | 206 | 11 | 0.564 |
| Female | 160 | 11 |  |
| **Subtype of tumor** |  |  |  |
| B | 327 | 18 | 0.287 |
| T | 39 | 4 |  |
| **BSA** | 0.74 (0.42,1.58) | 0.80 (0.41,1.77) | 0.773 |
| **Age** | 4.42 (0.75,14.00) | 4.96 (0.83,13.58) | 0.607 |
| **Degree of risk** |  |  |  |
| Low risk | 199 | 10 | 0.415 |
| Intermediate and high risk | 167 | 12 |  |
| **WBC (×109/L)** | 2.94 (1.09,20.64) | 3.34 (1.61,13.42) | 0.077 |
| **Hb (g/L)** | 103.95 ± 13.21 | 81.91 ± 7.19 | 0.000 |
| **PLT (×109/L)** | 250.50 (70.00,871.00) | 145.00 (67.00,633.00) | 0.000 |
| **ALB (g/L)** | 40.10 (26.00,49.80) | 38.22 (32.10,46.70) | 0.008 |
| **TBil (μmol/L)** | 7.20 (2.10,33.50) | 7.90 (3.90,18.50) | 0.527 |
| **ALT (U/L)** | 21.15 (3.90,199.60) | 16.20 (4.00,198.30) | 0.498 |
| **Cr** **(μmol/L)** | 42.90 (10.00,73.70) | 43.55 (19.00,73.90) | 0.482 |

Notes: Descriptive data are presented as the median (min, max).

Abbreviations: WBC, white blood cell count; Hb, hemoglobin; PLT, platelet count; ALB,albumin; TBil, total bilirubin; ALT, alanine transferase; Cr, creatinine.

Table S3 Relationship between patient characteristics and MTX-related neutropenia before every HD-MTX regimen

| Baseline characteristics | Neutropenia (grade ≥ 3) | | |
| --- | --- | --- | --- |
| 0 | 1 | P-value |
| **Gender** |  |  |  |
| Male | 147 | 70 | 0.004 |
| Female | 138 | 33 |  |
| **Subtype of tumor** |  |  |  |
| B | 254 | 91 | 0.830 |
| T | 31 | 12 |  |
| **BSA** | 0.74 (0.41,1.58) | 0.71 (0.42,1.77) | 0.020 |
| **Age** | 4.67 (0.83,14.00) | 4.00 (0.75,14.00) | 0.009 |
| **Degree of risk** |  |  |  |
| Low risk | 158 | 51 | 0.301 |
| Intermediate and high risk | 127 | 52 |  |
| **WBC (×109/L)** | 3.17 (1.09,20.64) | 2.55 (1.37,5.73) | 0.000 |
| **Hb (g/L)** | 102.34 ± 13.94 | 103.72 ± 13.86 | 0.388 |
| **PLT (×109/L)** | 255.00 (70.00,871.00) | 230.00 (67.00,656.00) | 0.066 |
| **ALB (g/L)** | 39.80 (26.00,48.31) | 40.80 (29.70,49.80) | 0.005 |
| **TBil (μmol/L)** | 7.20 (2.50,33.50) | 7.20 (2.10,28.10) | 0.875 |
| **ALT (U/L)** | 21.00 (3.90,199.60) | 21.30 (5.20,198.30) | 0.789 |
| **Cr** **(μmol/L)** | 42.60 (10.00,73.70) | 43.50 (10.00,73.90) | 0.061 |

Notes: Descriptive data are presented as the median (min, max).

Abbreviations: WBC, white blood cell count; Hb, hemoglobin; PLT, platelet count; ALB,albumin; TBil, total bilirubin; ALT, alanine transferase; Cr, creatinine.

Table S4 Relationship between patient characteristics and MTX-related febrile neutropenia before every HD-MTX regimen

| Baseline characteristics | Febrile neutropenia (grade ≥ 3) | | |
| --- | --- | --- | --- |
| 0 | 1 | P-value |
| **Gender** |  |  |  |
| Male | 191 | 26 | 0.409 |
| Female | 155 | 16 |  |
| **Subtype of tumor** |  |  |  |
| B | 308 | 37 | 0.857 |
| T | 38 | 5 |  |
| **BSA** | 0.75 (0.41,1.58) | 0.65 (0.42,1.77) | 0.002 |
| **Age** | 4.71 (0.75,14.00) | 2.75 (0.92,13.50) | 0.001 |
| **Degree of risk** |  |  |  |
| Low risk | 195 | 14 | 0.005 |
| Intermediate and high risk | 151 | 28 |  |
| **WBC (×109/L)** | 2.95 (1.09,20.64) | 3.47 (1.62,15.11) | 0.073 |
| **Hb (g/L)** | 102.93 ± 13.65 | 100.83 ± 15.94 | 0.357 |
| **PLT (×109/L)** | 246.50 (70.00,871.00) | 224.00 (67.00,711.00) | 0.495 |
| **ALB (g/L)** | 40.04 (26.00,49.80) | 40.04 (31.10,47.40) | 0.817 |
| **TBil (μmol/L)** | 7.20 (2.10,26.31) | 7.45 (2.80,33.50) | 0.250 |
| **ALT (U/L)** | 20.90 (4.00,199.60) | 28.55 (3.90,198.30) | 0.191 |
| **Cr** **(μmol/L)** | 42.85 (10.00,73.70) | 43.80 (15.00,73.90) | 0.155 |

Notes: Descriptive data are presented as the median (min, max).

Abbreviations: WBC, white blood cell count; Hb, hemoglobin; PLT, platelet count; ALB,albumin; TBil, total bilirubin; ALT, alanine transferase; Cr, creatinine.

Table S5 Relationship between patient characteristics and MTX-induced elevated ALT before every HD-MTX regimen

| Baseline characteristics | Elevated ALT (grade ≥ 3) | | |
| --- | --- | --- | --- |
| 0 | 1 | P-value |
| **Gender** |  |  |  |
| Male | 197 | 20 | 0.142 |
| Female | 162 | 9 |  |
| **Subtype of tumor** |  |  |  |
| B | 317 | 28 | 0.173 |
| T | 42 | 1 |  |
| **BSA** | 0.74 (0.41,1.77) | 0.68 (0.48,1.57) | 0.252 |
| **Age** | 4.58 (0.75,14.00) | 3.75 (1.17,13.42) | 0.312 |
| **Degree of risk** |  |  |  |
| Low risk | 194 | 15 | 0.810 |
| Intermediate and high risk | 165 | 14 |  |
| **WBC (×109/L)** | 2.98 (1.09,20.64) | 3.00 (1.61,15.11) | 0.782 |
| **Hb (g/L)** | 102.9 ± 13.94 | 100.31 ± 13.67 | 0.336 |
| **PLT (×109/L)** | 247.00 (67.00,836.00) | 226.00 (97.00,871.00) | 0.423 |
| **ALB (g/L)** | 40.10 (26.00,49.80) | 39.43 (33.30,49.50) | 0.648 |
| **TBil (μmol/L)** | 7.20 (2.10,33.50) | 7.11 (4.50,12.50) | 0.458 |
| **ALT (U/L)** | 20.40 (3.90,198.30) | 44.00 (12.00,199.60) | 0.000 |
| **Cr** **(μmol/L)** | 42.90 (10.00,73.90) | 43.00 (12.00,54.90) | 0.622 |

Notes: Descriptive data are presented as the median (min, max).

Abbreviations: WBC, white blood cell count; Hb, hemoglobin; PLT, platelet count; ALB,albumin; TBil, total bilirubin; ALT, alanine transferase; Cr, creatinine.

Table S6 Relationship between patient characteristics and MTX-induced elevated AST before every HD-MTX regimen

| Baseline characteristics | Elevated AST (grade ≥ 3) | | |
| --- | --- | --- | --- |
| 0 | 1 | P-value |
| **Gender** |  |  |  |
| Male | 200 | 17 | 0.445 |
| Female | 161 | 10 |  |
| **Subtype of tumor** |  |  |  |
| B | 318 | 27 | 0.058 |
| T | 43 | 0 |  |
| **BSA** | 0.74 (0.41,1.77) | 0.67 (0.47,1.57) | 0.087 |
| **Age** | 4.58 (0.75,14.00) | 3.75 (1.08,13.42) | 0.152 |
| **Degree of risk** |  |  |  |
| Low risk | 196 | 13 | 0.537 |
| Intermediate and high risk | 165 | 14 |  |
| **WBC (×109/L)** | 2.97 (1.09,20.64) | 3.06 (1.61,15.11) | 0.682 |
| **Hb (g/L)** | 103.12 ± 13.85 | 97.11 ± 13.81 | 0.037 |
| **PLT (×109/L)** | 245.00 (67.00,836.00) | 251.00 (107.00,871.00) | 0.846 |
| **ALB (g/L)** | 40.10 (26.00,49.80) | 38.20 (33.30,44.62) | 0.031 |
| **TBil (μmol/L)** | 7.30 (2.10,33.50) | 6.82 (2.50,18.50) | 0.100 |
| **ALT (U/L)** | 20.50 (3.90,199.60) | 37.00 (11.20,180.80) | 0.000 |
| **Cr** **(μmol/L)** | 42.60 (10.00,73.90) | 46.00 (12.00,53.00) | 0.366 |

Notes: Descriptive data are presented as the median (min, max).

Abbreviations: WBC, white blood cell count; Hb, hemoglobin; PLT, platelet count; ALB,albumin; TBil, total bilirubin; ALT, alanine transferase; Cr, creatinine.

Table S7 Relationship between patient characteristics and MTX-induced vomiting before every HD-MTX regimen

| Baseline characteristics | Vomiting (grade ≥ 2) | | |
| --- | --- | --- | --- |
| 0 | 1 | P-value |
| **Gender** |  |  |  |
| Male | 204 | 13 | 0.211 |
| Female | 155 | 16 |  |
| **Subtype of tumor** |  |  |  |
| B | 321 | 24 | 0.349 |
| T | 38 | 5 |  |
| **BSA** | 0.73 (0.41,1.77) | 0.82 (0.44,1.57) | 0.271 |
| **Age** | 4.42 (0.83,14.00) | 5.00 (0.75,13.50) | 0.174 |
| **Degree of risk** |  |  |  |
| Low risk | 194 | 15 | 0.810 |
| Intermediate and high risk | 165 | 14 |  |
| **WBC (×109/L)** | 2.93 (1.09,20.64) | 3.53 (1.62,8.88) | 0.041 |
| **Hb (g/L)** | 102.76 ± 13.60 | 102.0 ± 17.63 | 0.777 |
| **PLT (×109/L)** | 245.00 (67.00,871.00) | 265.00 (84.00,656.00) | 0.583 |
| **ALB (g/L)** | 40.10 (26.00,49.80) | 39.90 (31.71,45.10) | 0.238 |
| **TBil (μmol/L)** | 7.20 (2.10,28.10) | 7.90 (3.80,33.50) | 0.098 |
| **ALT (U/L)** | 21.00 (3.90,199.60) | 20.00 (4.80,169.00) | 0.380 |
| **Cr** **(μmol/L)** | 42.70 (10.00,73.90) | 46.10 (13.00,65.00) | 0.212 |

Notes: Descriptive data are presented as the median (min, max).

Abbreviations: WBC, white blood cell count; Hb, hemoglobin; PLT, platelet count; ALB,albumin; TBil, total bilirubin; ALT, alanine transferase; Cr, creatinine.

Table S8 Relationship between patient characteristics and MTX-induced oral mucositis before every HD-MTX regimen

| Baseline characteristics | Oral mucositis (grade ≥ 2) | | |
| --- | --- | --- | --- |
| 0 | 1 | P-value |
| **Gender** |  |  |  |
| Male | 194 | 23 | 0.872 |
| Female | 152 | 19 |  |
| **Subtype of tumor** |  |  |  |
| B | 304 | 41 | 0.066 |
| T | 42 | 1 |  |
| **BSA** | 0.74 (0.41,1.77) | 0.73 (0.47,1.57) | 0.909 |
| **Age** | 4.58 (0.75,14.00) | 4.33 (1.08,13.92) | 0.740 |
| **Degree of risk** |  |  |  |
| Low risk | 187 | 22 | 0.838 |
| Intermediate and high risk | 159 | 20 |  |
| **WBC (×109/L)** | 2.93 (1.09,20.64) | 3.45 (1.98,8.88) | 0.022 |
| **Hb (g/L)** | 103.2 ± 13.89 | 98.64 ± 13.54 | 0.045 |
| **PLT (×109/L)** | 245.50 (67.00,871.00) | 259.50 (84.00,762.00) | 0.972 |
| **ALB (g/L)** | 40.00 (26.00,49.80) | 40.19 (31.17,46.90) | 0.535 |
| **TBil (μmol/L)** | 7.20 (2.10,33.50) | 7.50 (3.10,23.60) | 0.562 |
| **ALT (U/L)** | 21.00 (3.90,199.60) | 21.05 (4.80,119.00) | 0.836 |
| **Cr** **(μmol/L)** | 42.60 (10.00,73.90) | 45.15 (13.00,59.60) | 0.360 |

Notes: Descriptive data are presented as the median (min, max).

Abbreviations: WBC, white blood cell count; Hb, hemoglobin; PLT, platelet count; ALB,albumin; TBil, total bilirubin; ALT, alanine transferase; Cr, creatinine.
